# Supplementary material
Source: PubMed Central journal article supplement (PMC3512144)
Supplement: supp_112.142125_FigureS1.pdf [file supp_112.142125_FigureS1.pdf]

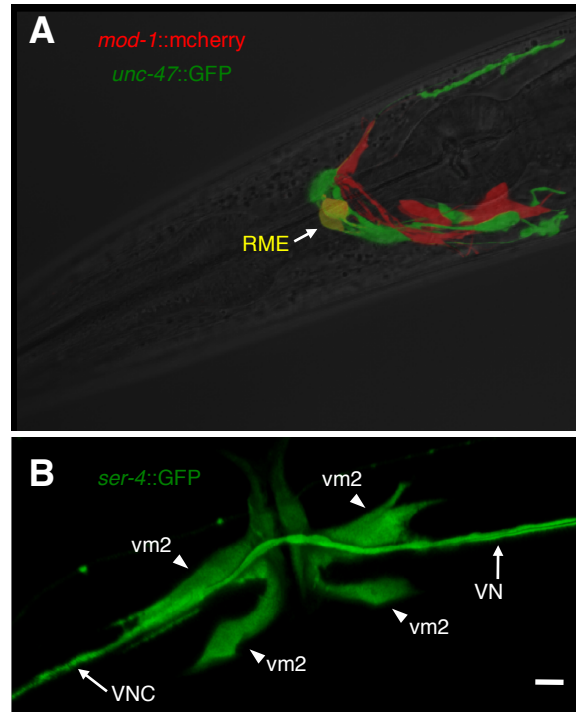

**Figure S1** Further details of *mod-1* and *ser-4* reporter expression patterns.

(A) Adult head region showing *mod-1::mCherry* and *unc-47::GFP* fluorescence superimposed on a brightfield image of the animal. The *unc-47* reporter labels GABAergic neurons. This image demonstrates that not all GABAergic neurons expressed *mod-1::mCherry*. The two doubled-labeled GABAergic cells (arrow) that did express *mod-1::mCherry* were RME interneurons.

(B) Ventral view of the vulval region of a young adult expressing *ser-4::GFP*. Arrows, the fluorescent ventral nerve cord (VNC) running the length of the animal. Arrowheads, the four *vm2* muscle cells also labeled by *ser-4::GFP*. Bar=40  $\mu$ m.
