# Supplementary material
Source: PubMed Central journal article supplement (PMC3512144)
Supplement: supp_112.142125_TableS1.pdf [file supp_112.142125_TableS1.pdf]

**Table S1 Molecular Lesions of Mutations Identified in This Work**

| Serotonin resistance mutation | Nucleotide sequence of the wild type <sup>a</sup> | Nucleotide sequence of the mutant <sup>a</sup> | Affected amino acid in the wild-type protein | Amino acid in the mutant protein |
|-------------------------------|---------------------------------------------------|------------------------------------------------|----------------------------------------------|----------------------------------|
| <i>goa-1(vs115)</i>           | tgcgtatatt <b>C</b> aagcacaatt                    | tgcgtatatt <b>T</b> aagcacaatt                 | Q305                                         | Stop                             |
| <i>goa-1(vs134)</i>           | agacggcatg <b>C</b> aagcggcaaa                    | agacggcatg <b>T</b> aagcggcaaa                 | Q29                                          | Stop                             |
| <i>goa-1(n4093)</i>           | tgcaccacatacagtgagtca                             | tgcaccacat[Mos1]acagtgagtca                    |                                              |                                  |
| <i>goa-1(n4402)</i>           | cttcgtggat <b>G</b> cggttgat                      | cttcgtggat <b>A</b> cggttgat                   | C351                                         | Y                                |
| <i>goa-1(n4405)</i>           | ctagcgccat <b>G</b> ggttgacca                     | ctagcgccat <b>A</b> ggttgacca                  | M1                                           | N/A                              |
| <i>goa-1(n4439)</i>           | catattttca <b>G</b> aaccgaatgc                    | catattttca <b>A</b> aaccgaatgc                 | intron 5 splice acceptor                     | N/A                              |
| <i>goa-1(n4492)</i>           | ttttcagaac <b>C</b> gaatgcacga                    | ttttcagaac <b>T</b> gaatgcacga                 | R243                                         | Stop                             |
| <i>goa-1(n4493)</i>           | aacggtgtg <b>G</b> ggagacgcag                     | aacggtgtg <b>A</b> ggagacgcag                  | W132                                         | Stop                             |
| <i>goa-1(n4494)</i>           | agcgaataag <b>G</b> taagaaaaaa                    | agcgaataag <b>A</b> taagaaaaaa                 | intron 7 splice donor                        | N/A                              |
| <i>eat-16(n4403)</i>          | aacctcgat <b>C</b> agacattgga                     | aacctcgat <b>T</b> agacattgga                  |                                              |                                  |
| <i>abts-1(n4094)</i>          | actttcatcgattatacagct                             | actttcatcga[Mos1]ttatacagct                    | N/A                                          | N/A                              |
| <i>ser-4(vs122)</i>           | atTTTTgcag <b>G</b> ttacctaaac                    | atTTTTgcag <b>A</b> ttacctaaac                 | G410                                         | D                                |
| <i>emb-9(vs114)</i>           | ggtcagccag <b>G</b> ttatccagga                    | ggtcagccag <b>A</b> ttatccagga                 | G1197                                        | D                                |
| <i>flp-1(n4491)</i>           | ttattattca <b>G</b> gtgtcggcag                    | ttattattca <b>A</b> gtgtcggcag                 | intron 1 splice acceptor                     | N/A                              |
| <i>flp-1(n4495)</i>           | atcattttca <b>G</b> tcgaagtga                     | atcattttca <b>A</b> tcgaagtga                  | intron 4 splice acceptor                     | N/A                              |
| <i>mod-1(vs107)</i>           | atggatgtgt <b>G</b> gatgcttgga                    | atggatgtgt <b>A</b> gatgcttgga                 | W305                                         | Stop                             |
| <i>mod-1(n3791)</i>           | ttgatcttg <b>G</b> gtttcattct                     | ttgatcttg <b>A</b> gtttcattct                  | W258                                         | Stop                             |
| <i>mod-1(n4054)</i>           | ctacgtcttactttccagttt                             | ctacgtcttac[Mos1]ttccagttt                     | N/A                                          | N/A                              |
| <i>elpc-3(vs119)</i>          | catgtatacg <b>G</b> atccgtcgtt                    | catgtatacg <b>A</b> atccgtcgtt                 | G475                                         | E                                |

<sup>a</sup>The affected nucleotide is capitalized and 10 nucleotides on either side are shown.
