# Supplementary material
Source: PubMed Central journal article supplement (PMC3512144)
Supplement: supp_112.142125_TableS2.pdf [file supp_112.142125_TableS2.pdf]

**Table S2 C. elegans Transgenes Used in This Work**

| Transgene                        | Purpose                                                                                                                                                                              | Used in                | Source                                                                                                                                                                                                                     |
|----------------------------------|--------------------------------------------------------------------------------------------------------------------------------------------------------------------------------------|------------------------|----------------------------------------------------------------------------------------------------------------------------------------------------------------------------------------------------------------------------|
| <i>vsIs123</i>                   | Overexpression of MOD-1. Carries multiple copies of wild-type <i>mod-1</i> genomic DNA.                                                                                              | Figure 2               | This work. Microinjection of a <i>mod-1</i> long-range PCR product at 20 ng/μl and pL15EK (a <i>lin-15</i> rescuing plasmid used as a coinjection marker) at 50 ng/μl. Chromosomal integration via UV/psoralen mutagenesis |
| <i>vsIs154</i><br><i>vsIs163</i> | Expression of mCherry from the <i>mod-1</i> promoter. These two alleles are independent chromosomal integrants.                                                                      | Figures 3, S1, File S3 | This work. Microinjection of the <i>mod-1::mCherry</i> plasmid pGG17 at 65 ng/μl and pL15EK at 50 ng/μl. Chromosomal integration via UV/psoralen mutagenesis                                                               |
| <i>oxIs12</i>                    | Expression of GFP in GABAergic neurons from the <i>unc-47</i> promoter.                                                                                                              | Figures 3, S1          | McIntire <i>et al.</i> 1997 <sup>a</sup>                                                                                                                                                                                   |
| <i>ljIs102</i>                   | Expression of Channelrhodopsin2::YFP in the serotonergic NSM and ADF neurons.                                                                                                        | Figure 4<br>File S4    | Ezcurra <i>et al.</i> 2011                                                                                                                                                                                                 |
| <i>nEx1403</i>                   | Rescue of the <i>ser-4</i> mutant phenotype by expression of a <i>ser-4</i> cDNA from the <i>ser-4</i> promoter.                                                                     | Figure 5               | This work. Microinjection of the plasmid pMG12 at 10 ng/μl and pL15EK at 20 ng/μl                                                                                                                                          |
| <i>nEx1404</i>                   | Negative control for <i>ser-4</i> rescue. Similar to <i>nEx1403</i> except that the <i>ser-4</i> cDNA used carries a frame shift mutation that prevents expression of SER-4 protein. | Figure 5               | This work. Microinjection of the plasmid pMG13 at 10 ng/μl and pL15EK at 20 ng/μl                                                                                                                                          |
| <i>ljIs570</i>                   | Expression of GFP from the <i>ser-4</i> promoter.                                                                                                                                    | Figure 3<br>File S3    | A gift of S. Shyn and W. Schafer. Chromosomal integrant of the extrachromosomal transgene <i>adEx1616</i> from Tsalik <i>et al.</i> (2003)                                                                                 |
| <i>vsIs48</i>                    | Expression of GFP in cholinergic neurons from the <i>unc-17</i> promoter.                                                                                                            | Data not shown         | Chase <i>et al.</i> 2004                                                                                                                                                                                                   |

<sup>a</sup> McIntire, S. L., R. J. Reimer, K. Schuske, R. H. Edwards, and E. M. Jorgensen, 1997 Identification and characterization of the vesicular GABA transporter. *Nature* 389: 870-876.
